# Supplementary material
Source: Elsevier journal article supplement (https://www.sciencedirect.com/science/article/pii/S0300893221003572)
Supplement: mmc1 [file S0300893221003572:mmc1.pdf]

## SUPPLEMENTARY DATA

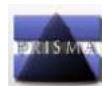

### PRISMA 2020 Checklist

| Section and Topic    | Item # | Checklist item                                                                                                                                                                                                                                                                   | Location where item is reported                                               |
|----------------------|--------|----------------------------------------------------------------------------------------------------------------------------------------------------------------------------------------------------------------------------------------------------------------------------------|-------------------------------------------------------------------------------|
| <b>TITLE</b>         |        |                                                                                                                                                                                                                                                                                  |                                                                               |
| Title                | 1      | Identify the report as a systematic review.                                                                                                                                                                                                                                      | Title                                                                         |
| <b>ABSTRACT</b>      |        |                                                                                                                                                                                                                                                                                  |                                                                               |
| Abstract             | 2      | See the PRISMA 2020 for Abstracts checklist.                                                                                                                                                                                                                                     | Abstract                                                                      |
| <b>INTRODUCTION</b>  |        |                                                                                                                                                                                                                                                                                  |                                                                               |
| Rationale            | 3      | Describe the rationale for the review in the context of existing knowledge.                                                                                                                                                                                                      | Introduction                                                                  |
| Objectives           | 4      | Provide an explicit statement of the objective(s) or question(s) the review addresses.                                                                                                                                                                                           | Introduction                                                                  |
| <b>METHODS</b>       |        |                                                                                                                                                                                                                                                                                  |                                                                               |
| Eligibility criteria | 5      | Specify the inclusion and exclusion criteria for the review and how studies were grouped for the syntheses.                                                                                                                                                                      | Study design                                                                  |
| Information sources  | 6      | Specify all databases, registers, websites, organisations, reference lists and other sources searched or consulted to identify studies. Specify the date when each source was last searched or consulted.                                                                        | Database search, study selection, data extraction and risk of bias assessment |
| Search strategy      | 7      | Present the full search strategies for all databases, registers, and websites, including any filters and limits used.                                                                                                                                                            | Database search, study selection, data extraction and risk of bias assessment |
| Selection process    | 8      | Specify the methods used to decide whether a study met the inclusion criteria of the review, including how many reviewers screened each record and each report retrieved, whether they worked independently, and if applicable, details of automation tools used in the process. | Database search, study selection, data extraction and risk of bias assessment |
| Data collection      | 9      | Specify the methods used to collect data from reports, including how many reviewers collected data from each report, whether they worked                                                                                                                                         | Database                                                                      |

| Section and Topic             | Item # | Checklist item                                                                                                                                                                                                                                                                | Location where item is reported                                               |
|-------------------------------|--------|-------------------------------------------------------------------------------------------------------------------------------------------------------------------------------------------------------------------------------------------------------------------------------|-------------------------------------------------------------------------------|
| process                       |        | independently, any processes for obtaining or confirming data from study investigators, and if applicable, details of automation tools used in the process.                                                                                                                   | search, study selection, data extraction and risk of bias assessment          |
| Data items                    | 10a    | List and define all outcomes for which data were sought. Specify whether all results that were compatible with each outcome domain in each study were sought (e.g. for all measures, time points, analyses), and if not, the methods used to decide which results to collect. | Study design                                                                  |
|                               | 10b    | List and define all other variables for which data were sought (e.g. participant and intervention characteristics, funding sources). Describe any assumptions made about any missing or unclear information.                                                                  | Study design                                                                  |
| Study risk of bias assessment | 11     | Specify the methods used to assess risk of bias in the included studies, including details of the tool(s) used, how many reviewers assessed each study and whether they worked independently, and if applicable, details of automation tools used in the process.             | Database search, study selection, data extraction and risk of bias assessment |
| Effect measures               | 12     | Specify for each outcome the effect measure(s) (e.g. risk ratio, mean difference) used in the synthesis or presentation of results.                                                                                                                                           | Data synthesis and analysis                                                   |
| Synthesis methods             | 13a    | Describe the processes used to decide which studies were eligible for each synthesis (e.g. tabulating the study intervention characteristics and comparing against the planned groups for each synthesis (item #5)).                                                          | Study design                                                                  |
|                               | 13b    | Describe any methods required to prepare the data for presentation or synthesis, such as handling of missing summary statistics, or data conversions.                                                                                                                         | Study design                                                                  |
|                               | 13c    | Describe any methods used to tabulate or visually display results of individual studies and syntheses.                                                                                                                                                                        | Data synthesis and analysis                                                   |
|                               | 13d    | Describe any methods used to synthesize results and provide a rationale for the choice(s). If meta-analysis was performed, describe the model(s), method(s) to identify the presence and extent of statistical heterogeneity, and software package(s) used.                   | Data synthesis and analysis                                                   |
|                               | 13e    | Describe any methods used to explore possible causes of heterogeneity among study results (e.g. subgroup analysis, meta-regression).                                                                                                                                          | Data synthesis and analysis                                                   |
|                               | 13f    | Describe any sensitivity analyses conducted to assess robustness of the synthesized results.                                                                                                                                                                                  | Data synthesis and analysis                                                   |
| Reporting bias assessment     | 14     | Describe any methods used to assess risk of bias due to missing results in a synthesis (arising from reporting biases).                                                                                                                                                       | Data synthesis and analysis                                                   |
| Certainty                     | 15     | Describe any methods used to assess certainty (or confidence) in the body of evidence for an outcome.                                                                                                                                                                         | Data synthesis                                                                |

| Section and Topic             | Item # | Checklist item                                                                                                                                                                                                                                                                       | Location where item is reported                                                  |
|-------------------------------|--------|--------------------------------------------------------------------------------------------------------------------------------------------------------------------------------------------------------------------------------------------------------------------------------------|----------------------------------------------------------------------------------|
| assessment                    |        |                                                                                                                                                                                                                                                                                      | and analysis                                                                     |
| <b>RESULTS</b>                |        |                                                                                                                                                                                                                                                                                      |                                                                                  |
| Study selection               | 16a    | Describe the results of the search and selection process, from the number of records identified in the search to the number of studies included in the review, ideally using a flow diagram.                                                                                         | Results                                                                          |
|                               | 16b    | Cite studies that might appear to meet the inclusion criteria, but which were excluded, and explain why they were excluded.                                                                                                                                                          | Results                                                                          |
| Study characteristics         | 17     | Cite each included study and present its characteristics.                                                                                                                                                                                                                            | Results                                                                          |
| Risk of bias in studies       | 18     | Present assessments of risk of bias for each included study.                                                                                                                                                                                                                         | Results                                                                          |
| Results of individual studies | 19     | For all outcomes, present, for each study: (a) summary statistics for each group (where appropriate) and (b) an effect estimate and its precision (e.g. confidence/credible interval), ideally using structured tables or plots.                                                     | Impact of lipid-lowering therapies on ASCVD according to coronary artery calcium |
| Results of syntheses          | 20a    | For each synthesis, briefly summarise the characteristics and risk of bias among contributing studies.                                                                                                                                                                               | Impact of lipid-lowering therapies on ASCVD according to coronary artery calcium |
|                               | 20b    | Present results of all statistical syntheses conducted. If meta-analysis was done, present for each the summary estimate and its precision (e.g. confidence/credible interval) and measures of statistical heterogeneity. If comparing groups, describe the direction of the effect. | Impact of lipid-lowering therapies on ASCVD according to coronary artery calcium |
|                               | 20c    | Present results of all investigations of possible causes of heterogeneity among study results.                                                                                                                                                                                       | Impact of lipid-lowering therapies on ASCVD                                      |

| Section and Topic                              | Item # | Checklist item                                                                                                                                                                                                                             | Location where item is reported                                                             |
|------------------------------------------------|--------|--------------------------------------------------------------------------------------------------------------------------------------------------------------------------------------------------------------------------------------------|---------------------------------------------------------------------------------------------|
|                                                |        |                                                                                                                                                                                                                                            | according to coronary artery calcium                                                        |
|                                                | 20d    | Present results of all sensitivity analyses conducted to assess the robustness of the synthesized results.                                                                                                                                 | Atherosclerotic cardiovascular disease risk stratification by coronary artery calcium score |
| Reporting biases                               | 21     | Present assessments of risk of bias due to missing results (arising from reporting biases) for each synthesis assessed.                                                                                                                    | Results                                                                                     |
| Certainty of evidence                          | 22     | Present assessments of certainty (or confidence) in the body of evidence for each outcome assessed.                                                                                                                                        | Results                                                                                     |
| <b>DISCUSSION</b>                              |        |                                                                                                                                                                                                                                            |                                                                                             |
| Discussion                                     | 23a    | Provide a general interpretation of the results in the context of other evidence.                                                                                                                                                          | Discussion                                                                                  |
|                                                | 23b    | Discuss any limitations of the evidence included in the review.                                                                                                                                                                            | Limitations                                                                                 |
|                                                | 23c    | Discuss any limitations of the review processes used.                                                                                                                                                                                      | Limitations                                                                                 |
|                                                | 23d    | Discuss implications of the results for practice, policy, and future research.                                                                                                                                                             | Discussion                                                                                  |
| <b>OTHER INFORMATION</b>                       |        |                                                                                                                                                                                                                                            |                                                                                             |
| Registration and protocol                      | 24a    | Provide registration information for the review, including register name and registration number, or state that the review was not registered.                                                                                             | Methods                                                                                     |
|                                                | 24b    | Indicate where the review protocol can be accessed, or state that a protocol was not prepared.                                                                                                                                             | Methods                                                                                     |
|                                                | 24c    | Describe and explain any amendments to information provided at registration or in the protocol.                                                                                                                                            | Methods                                                                                     |
| Support                                        | 25     | Describe sources of financial or non-financial support for the review, and the role of the funders or sponsors in the review.                                                                                                              | Fundings                                                                                    |
| Competing interests                            | 26     | Declare any competing interests of review authors.                                                                                                                                                                                         | Conflict of Interest                                                                        |
| Availability of data, code and other materials | 27     | Report which of the following are publicly available and where they can be found: template data collection forms; data extracted from included studies; data used for all analyses; analytic code; any other materials used in the review. | Methods                                                                                     |

From: Page MJ, McKenzie JE, Bossuyt PM, Boutron I, Hoffmann TC, Mulrow CD, et al. The PRISMA 2020 statement: an updated guideline for reporting systematic reviews. *BMJ* 2021;372:n71. doi: 10.1136/bmj.n71

For more information, visit: <http://www.prisma-statement.org/>

**Table 1 of the supplementary data.** Risk of bias assessment for individual studies.

| Study name                                                                   | Selection bias                                                                    | Performance bias                                                                    | Attrition bias                                                                      | Detection bias                                                                        | Reporting bias                                                                        | Overall bias                                                                          |
|------------------------------------------------------------------------------|-----------------------------------------------------------------------------------|-------------------------------------------------------------------------------------|-------------------------------------------------------------------------------------|---------------------------------------------------------------------------------------|---------------------------------------------------------------------------------------|---------------------------------------------------------------------------------------|
| The St. Francis Heart Study<br>Waheed et al., <sup>13</sup> 2016             |  | +/-                                                                                 | +/-                                                                                 |    |    | +/-                                                                                   |
| Korean registry<br>Hwang et al., <sup>14</sup> 2015                          | +/-                                                                               | +/-                                                                                 |    |    |    | +/-                                                                                   |
| The BioImage Study<br>Mortenses et al., <sup>4</sup> 2016                    | +/-                                                                               |    |    |    |    |    |
| Walter Reed Army Medical Center study<br>Mitchell et al., <sup>15</sup> 2018 | +/-                                                                               | +/-                                                                                 |   |   |   | +/-                                                                                   |
| Multi-Ethnic Study of Atherosclerosis<br>Budoff et al., <sup>9</sup> 2018    | +/-                                                                               |  |  |  |  |  |

**Table 2 of the supplementary data.** ASCVD incidence rates for each study overall and categorized by lipid-lowering therapy and CAC strata-

| Study Name ASCVD                  |         |                        |                           |                |                        |                           |                |                        |                           |
|-----------------------------------|---------|------------------------|---------------------------|----------------|------------------------|---------------------------|----------------|------------------------|---------------------------|
| First author. publication year    | No CAC  |                        |                           | CAC 1-99       |                        |                           | CAC ≥100       |                        |                           |
|                                   | Overall | Lipid-lowering therapy | No lipid-lowering therapy | Overall        | Lipid-lowering therapy | No lipid-lowering therapy | Overall        | Lipid-lowering therapy | No lipid-lowering therapy |
| Hwang et al., <sup>14</sup> 2015  |         |                        |                           |                |                        |                           |                |                        |                           |
| Absolute proportion               | 0/0 (0) | 0/0 (0)                | 0/0 (0)                   | 132/5755 (2.3) | 22/1265 (1.7)          | 110/4490 (2.5)            | 104/1733 (4.3) | 15/427 (3.5)           | 89/1306 (6.8)             |
| Incidence (1000 person/year)      | -       | -                      | -                         | 10.4           | 9.2                    | 7.9                       | 27.3           | 11.3                   | 35.9                      |
| Waheed et al., <sup>13</sup> 2016 |         |                        |                           |                |                        |                           |                |                        |                           |
| Absolute proportion               | 0/0 (0) | 0/0 (0)                | 0/0 (0)                   | 0/96 (0)       | 0/44 (0)               | 0/52 (0)                  | 85/894 (9.5)   | 36/437 (8.2)           | 49/457 (10.7)             |

|                                     |                |                |                |                |               |                |                 |                 |                 |
|-------------------------------------|----------------|----------------|----------------|----------------|---------------|----------------|-----------------|-----------------|-----------------|
| Incidence (1000 person/year)        | -              | -              | -              | 0              | 0             | 0              | 9.5             | 8.2             | 10.7            |
| Mortenses et al., <sup>4</sup> 2016 |                |                |                |                |               |                |                 |                 |                 |
| Absolute proportion                 | 15/1852 (0.8)  | 4/500 (0.8)    | 11/1352 (0.8)  | 25/1675 (1.5)  | 8/586 (1.4)   | 17/1089 (1.6)  | 98/2278 (4.3)   | 31/911 (3.4)    | 67/1367 (4.9)   |
| Incidence (1000 person/year)        | 3.0            | 3.0            | 3.0            | 5.5            | 5.1           | 5.8            | 15.9            | 12.6            | 18.2            |
| Mitchell et al., <sup>15</sup> 2018 |                |                |                |                |               |                |                 |                 |                 |
| Absolute proportion                 | 214/9360 (2.3) | 100/3742 (2.7) | 114/5618 (2.0) | 108/2877 (3.8) | 76/1933 (3.9) | 32/944 (3.4)   | 155/1407 (11.0) | 123/1211 (10.2) | 32/196 (16.3)   |
| Incidence (1000 person/year)        | 2.3            | 2.7            | 2.0            | 3.8            | 3.9           | 3.4            | 11.0            | 10.2            | 16.3            |
| Budoff et al., <sup>9</sup> 2018    |                |                |                |                |               |                |                 |                 |                 |
| Absolute proportion                 | 109/3390 (3.2) | 13/361 (3.6)   | 96/3029 (3.2)  | 141/1785 (7.9) | 27/348 (7.8)  | 114/1437 (7.9) | 247/1593 (15.5) | 60/392 (15.3)   | 187/1201 (15.6) |

Gallone G, et al. Impact of lipid-lowering therapies on cardiovascular outcomes according to coronary artery calcium score.  
A systematic review and meta-analysis

|                                 |     |     |     |     |     |     |      |      |      |
|---------------------------------|-----|-----|-----|-----|-----|-----|------|------|------|
| Incidence (1000<br>person/year) | 3.2 | 3.6 | 3.2 | 7.9 | 7.8 | 7.9 | 15.5 | 15.3 | 15.6 |
|---------------------------------|-----|-----|-----|-----|-----|-----|------|------|------|

ASCVD, atherosclerotic cardiovascular disease; CAC, coronary artery calcium.

Number of events are provided as n° of events/n° of patients exposed. Incidence data are provided in person-year (n/N \* years).

**Table 3 of the supplementary data.** Odds ratios (95% confidence intervals) for ASCVD occurrence categorized by CAC strata among patients on lipid-lowering therapy prior to CAC assessment

| ASCVD OR (95%CI) for increasing CAC strata among patients on lipid-lowering therapy prior to CAC assessment |                                     |                                       |                                  |                   |
|-------------------------------------------------------------------------------------------------------------|-------------------------------------|---------------------------------------|----------------------------------|-------------------|
| CAC strata                                                                                                  | Mortenses et al., <sup>4</sup> 2016 | Mitchell et al., <sup>15</sup> , 2018 | Budoff et al., <sup>9</sup> 2018 | POOLED            |
|                                                                                                             | 2016                                | 2018                                  |                                  |                   |
| CAC none                                                                                                    | 0.58 [0.17, 1.95]                   | 0.67 [0.50, 0.91]                     | 0.44 [0.23, 0.88]                | 0.57 [0.41, 0.73] |
| CAC 0-100                                                                                                   | REF                                 | REF                                   | REF                              | REF               |
| CAC >100                                                                                                    | 2.55 [1.16, 5.58]                   | 2.76 [1.71, 4.46]                     | 2.15 [1.33, 3.47]                | 2.18 [1.98, 2.39] |

95%CI, 95% confidence interval; ASCVD, atherosclerotic cardiovascular disease; CAC, coronary artery calcium; OR, odds ratio.

*Gallone G, et al. Impact of lipid-lowering therapies on cardiovascular outcomes according to coronary artery calcium score. A systematic review and meta-analysis.*

## **STUDY SEARCH**

("calcium artery score" [tiab] OR "calcium score"[tiab] OR "CAC"[tiab]) AND ("statin" [tiab] OR "lipid lowering" [tiab] OR "preventive therapy" [tiab])

Gallone G, et al. Impact of lipid-lowering therapies on cardiovascular outcomes according to coronary artery calcium score. A systematic review and meta-analysis. Guidelines for Deciding Whether Apparent Differences in Subgroup Response Are Real (Sun et al, JAMA 2014;311:405-411)

**1) Can Chance Explain the Subgroup Difference?**

The observed subgroup differences in both unadjusted and adjusted analyses (figure 2 and figure 3) are not explained by chance as the p for interaction among subgroups are significant ( $P = .004$  and  $.003$ : ie, the chance that a subgroup effect is identified by chance is of 0.4 and 0.1%, respectively).

**2) Is the subgroup difference consistent across studies?**

Subgroup analyses were limitedly presented in the studies included in the present meta-analysis. Consistently with our results, the subgroup analysis presented by the study by Mitchell et al comparing patients with and without statin exposure, statin therapy was associated with reduced risk of ASCVD in patients with CAC ( $P = .015$ ), but not in patients without CAC ( $P = .99$ ). Moreover, the effect of statin use on ASCVD was significantly related to the severity of CAC ( $P < .0001$  for interaction).

**3) Was the subgroup difference one of a small number of a priori hypotheses in which the direction was accurately prespecified?**

Yes, it is. Indeed, it was the primary study hypothesis of the meta-analysis: ie, the interaction of CAC strata with the benefit of lipid-lowering therapy.

**4) Is there a strong preexisting biological rationale supporting the apparent subgroup effect?**

Yes, there is a strong physiopathological rationale for the observed interaction of CAC strata with the benefit of lipid-lowering therapy. Specifically, patients with more extensive CAC burden have more extensive and more active atherosclerosis which may benefit from lipid-lowering therapy.

**5) Is the subgroup difference suggested by comparisons within rather than between studies?**

Yes, a visual analysis of figure 2 and figure 3 suggests that the subgroup differences observed with the meta-analytic approach are consistent within individual studies.
